# Supplementary material
Source: publisher figshare collection journal article supplement (https://karger.figshare.com/ndownloader/files/28365888)
Supplement: Supplementary file 1 [file 28365888]

**Table S7:** Survival rates, M-SIRT applied to the external cohort

| **M-SIRT** | **1-year survival (%)** | **3-year survival (%)** | **5-year survival (%)** |
| --- | --- | --- | --- |
| **Stage I** | 70.4 | 37.3 | 20.4 |
| **Stage II** | 57.9 | 7.4 | 3.7 |
| **Stage III** | 35.3 | 4.7 | - |
